# Supplementary material for: Role of emission sources and atmospheric sink on the seasonal cycle of CH&lt;sub&gt;4&lt;/sub&gt; and δ&lt;sup&gt;13&lt;/sup&gt;-CH&lt;sub&gt;4&lt;/sub&gt;: analysis based on the atmospheric chemistry transport model TM5
Source: Copernicus journal article supplement (doi:10.5194/acp-2021-843), 2021-11-15
Supplement: Supplementary file 1 [file acp-2021-843-supplement.pdf]

# **Supplementary Materials for: Role of sources and atmospheric sink on seasonal cycle of CH<sub>4</sub> and $\delta^{13}$ -CH<sub>4</sub>: analysis based on atmospheric chemistry transport model**

Vilma Kangasaho<sup>1</sup>, Aki Tsuruta<sup>1</sup>, Leif Backman<sup>1</sup>, Pyry Mäkinen<sup>2</sup>, Sander Houweling<sup>3,4</sup>, Arjo Segers<sup>5</sup>, Maarten Krol<sup>6,7</sup>, Ed Dlugokencky<sup>8</sup>, Sylvia Michel<sup>9</sup>, James White<sup>9</sup>, and Tuula Aalto<sup>1</sup>

<sup>1</sup>Finnish Meteorological Institute, P.O. Box.503, FI-00101, Helsinki, Finland

<sup>2</sup>Aalto University, Finland

<sup>3</sup>SRON Netherlands Institute for Space Research, the Netherlands

<sup>4</sup>Vrije Universiteit Amsterdam, the Netherlands

<sup>5</sup>Netherlands Organisation for Applied Scientific Research (TNO), Utrecht, the Netherlands

<sup>6</sup>Wageningen University & Research, Meteorology and Air Quality, the Netherlands

<sup>7</sup>IMAU, Utrecht University, the Netherlands

<sup>8</sup>NOAA Global Monitoring Laboratory (GML), USA

<sup>9</sup>NSTAAR, University of Colorado, USA

**Correspondence:** Vilma Kangasaho (vilma.kangasaho@fmi.fi)

**Table S1.** IPCC CH<sub>4</sub> source division based on 1996 Guidelines (Houghton et al., 1997)

|                                                  | IPCC class |
|--------------------------------------------------|------------|
| <b>Energy</b>                                    | <b>1</b>   |
| Fuel Combustion Activities                       | 1A         |
| Energy Industries                                | 1A1        |
| Manufacturing Industries and Construction (ISIC) | 1A2        |
| Transport                                        | 1A3        |
| Civil Aviation                                   | 1A3a       |
| Road Transportation                              | 1A3b       |
| Railways                                         | 1A3c       |
| Navigation                                       | 1A3d       |
| Other Transportation                             | 1A3e       |
| Other Sectors                                    | 1A4        |
| Fugitive Emissions from Fuels                    | 1B         |
| Solid Fuels                                      | 1B1        |
| Oil and Natural Gas                              | 1B2        |
| Oil                                              | 1B2a       |
| Natural Gas                                      | 1B2a       |
| <b>Solvent and Other Product Use</b>             | <b>2</b>   |
| Chemical Industry                                | 2B         |
| Metal Industry                                   | 2C         |
| <b>Agriculture</b>                               | <b>4</b>   |
| Enteric Fermentation                             | 4A         |
| Manure Management                                | 4B         |
| Rice Cultivation                                 | 4C         |
| Agricultural Soils                               | 4D         |
| <b>Waste</b>                                     | <b>6</b>   |
| Solid Waste and Disposal on Land                 | 6A         |
| Waste Water Handling                             | 6B         |
| Waste Incineration                               | 6C         |
| Other                                            | 6D         |
| <b>Other</b>                                     | <b>7</b>   |
| Fossil Fuel Fires                                | 7A         |

**Table S2.** Sectors formed in this study based on EDGAR database and IPCC classification.

| <b>Sector</b>                              | <b>EDGAR 4.3.2</b>                                                                                                                                                                                  | <b>EDGAR 5.0</b>                                                                                                                                                                                      |
|--------------------------------------------|-----------------------------------------------------------------------------------------------------------------------------------------------------------------------------------------------------|-------------------------------------------------------------------------------------------------------------------------------------------------------------------------------------------------------|
| Enteric Fermentation and Manure Management | 4A, 4B                                                                                                                                                                                              | 4A, 4B                                                                                                                                                                                                |
| Landfills and Waste Water Treatment        | 6A, 6B, 6C, 6D                                                                                                                                                                                      | 6A, 6B, 6C, 6D                                                                                                                                                                                        |
| Rice cultivation                           | 4C, 4D1, 4D2, 4D4                                                                                                                                                                                   | 4C, 4D                                                                                                                                                                                                |
| Coal                                       | 1B1a                                                                                                                                                                                                | 1B1a                                                                                                                                                                                                  |
| Oil and Gas                                | 1B2a1, 1B2a2, 1B2a3, 1B2a4, 1B2c, 1A3a_CDS, 1A3a_CRS, 1A3aLTO, 1A3a_SPS, 1A3c, 1A3e, 1A3d, 1A3b, 2B, 2C1c, 2C1d, 2C1e, 2C1f, 2C2, 1A1a, 1A2, 1A1b, 1A1c, 1A5b1, 1B1b, 1B2a5, 1B2a6, 1B2b5, 2C1b, 7A | 1A1a, 1A1b, 1A1c, 1A5b1, 1B1b, 1B2a5, 1B2a6, 1B2b5, 2C1b, 1A2, 1A3a_CDS, 1A3a_CRS, 1A3a_LTO, 1A3b, 1A3c, 1A3e, 1A3d, 1C2, 1B2a1, 1B2a2, 1B2a3, 1B2a4, 1B2c, 2B, 2C1a, 2C1c, 2C1d, 2C1e, 2C1f, 2C2, 7A |
| Residential                                | 1A4                                                                                                                                                                                                 | 1A4                                                                                                                                                                                                   |

**Table S3.** Average global emission amplitude ( $\text{Tg CH}_4 \text{ month}^{-1}$ ), and the months when seasonal minimum and maximum occurs. For EDGAR components, those for 2010 and 2015 for v4.3.2 and v5.0 are shown, respectively. For natural sources, the variation shows those between different years. Those marked with "\*" does not have monthly variations. Note that geological and termite emissions do not have seasonal variability, and thus not included in this table.

| Data source           | Component                                         | Amplitude | MIN                   | MAX                                      |
|-----------------------|---------------------------------------------------|-----------|-----------------------|------------------------------------------|
| EDGAR v4.3.2          | Enteric Fermentation and Manure Management (EFMM) | 7.50      | Nov.                  | Mar.                                     |
|                       | Landfills and Waste Water Treatment (LWW)         | *         | *                     | *                                        |
|                       | Rice (RICE)                                       | 2.61      | Jan., Dec.            | Mar.                                     |
|                       | Coal                                              | 0.03      | Jul.                  | Jan.                                     |
|                       | Oil and Gas                                       | 0.07      | Jul.                  | Nov.                                     |
|                       | Residential                                       | 0.78      | Jul.                  | Jan.                                     |
| EDGAR v5.0            | Enteric Fermentation and Manure Management (EFMM) | *         | *                     | *                                        |
|                       | Landfills and Waste Water Treatment (LWW)         | *         | *                     | *                                        |
|                       | Rice                                              | 5.51      | Mar.                  | Aug.                                     |
|                       | Coal                                              | *         | *                     | *                                        |
|                       | Oil and Gas                                       | 0.10      | Sep.                  | Jan.                                     |
|                       | Residential                                       | 1.65      | Sep.                  | Jan.                                     |
| LPX-Bern v1.4         | Wetland                                           | 8.55      | Nov., Dec.            | Jul., Aug.                               |
| LPX-Bern v1.4         | Soil sink                                         | 0.99      | Jul.                  | Jan., Feb.                               |
| GFED v4.2             | Fires                                             | 2.44      | Feb.–Apr., Nov.       | Jun.–Aug.                                |
| Tsuruta et al. (2017) | Ocean                                             | 0.08      | Feb., Apr.–Jun., Nov. | Jan., Mar.,<br>Jul., Aug.,<br>Oct., Nov. |



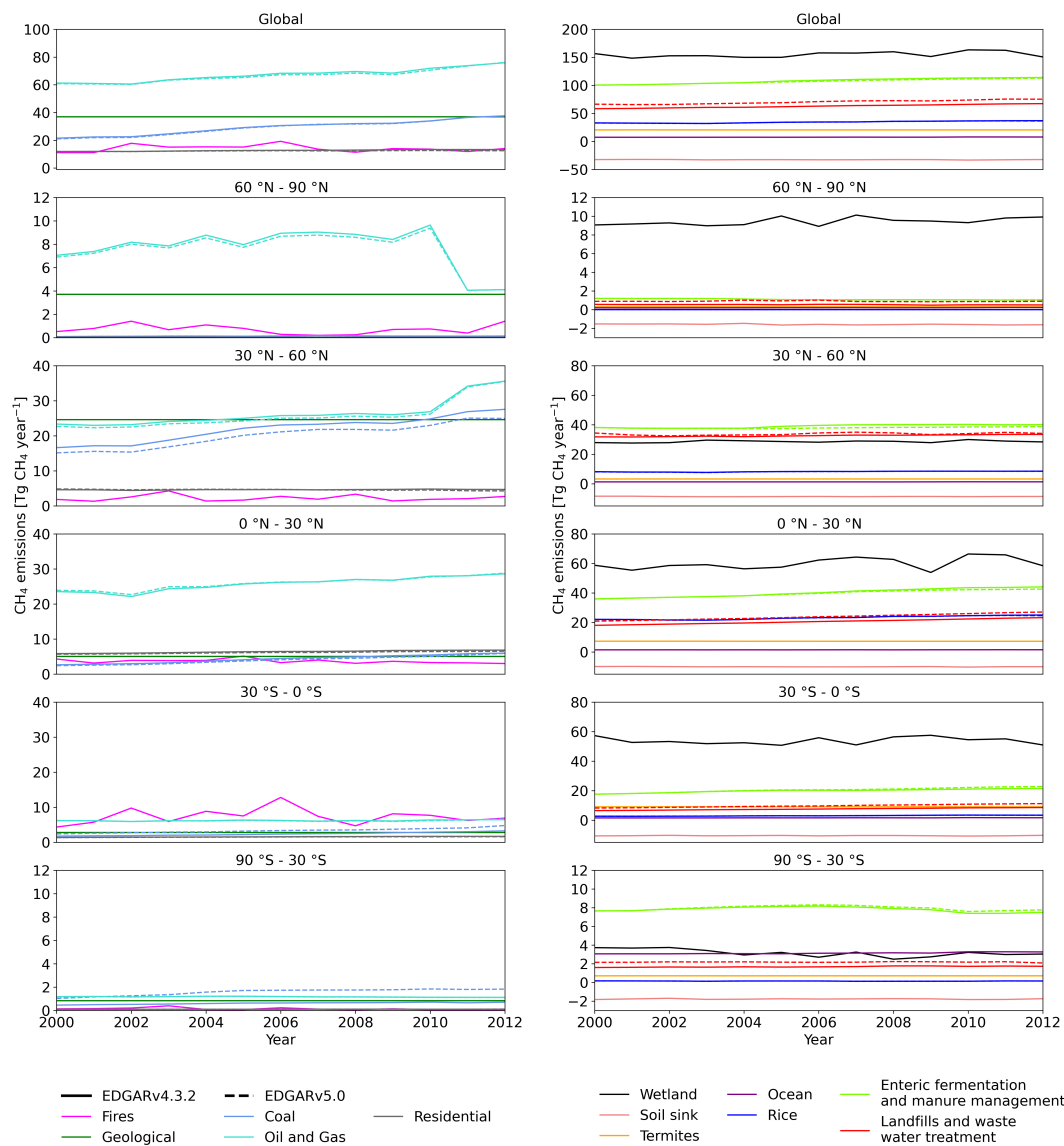

**Figure S1.** Annual total global (top) and latitudinal zonal total CH<sub>4</sub> emissions during 2000–2012. The left-hand side panel includes fossil-based emissions and the right-hand side panel emissions from biogenic origin, both natural and anthropogenic. Global emissions (top) are split into 30° latitude bands.

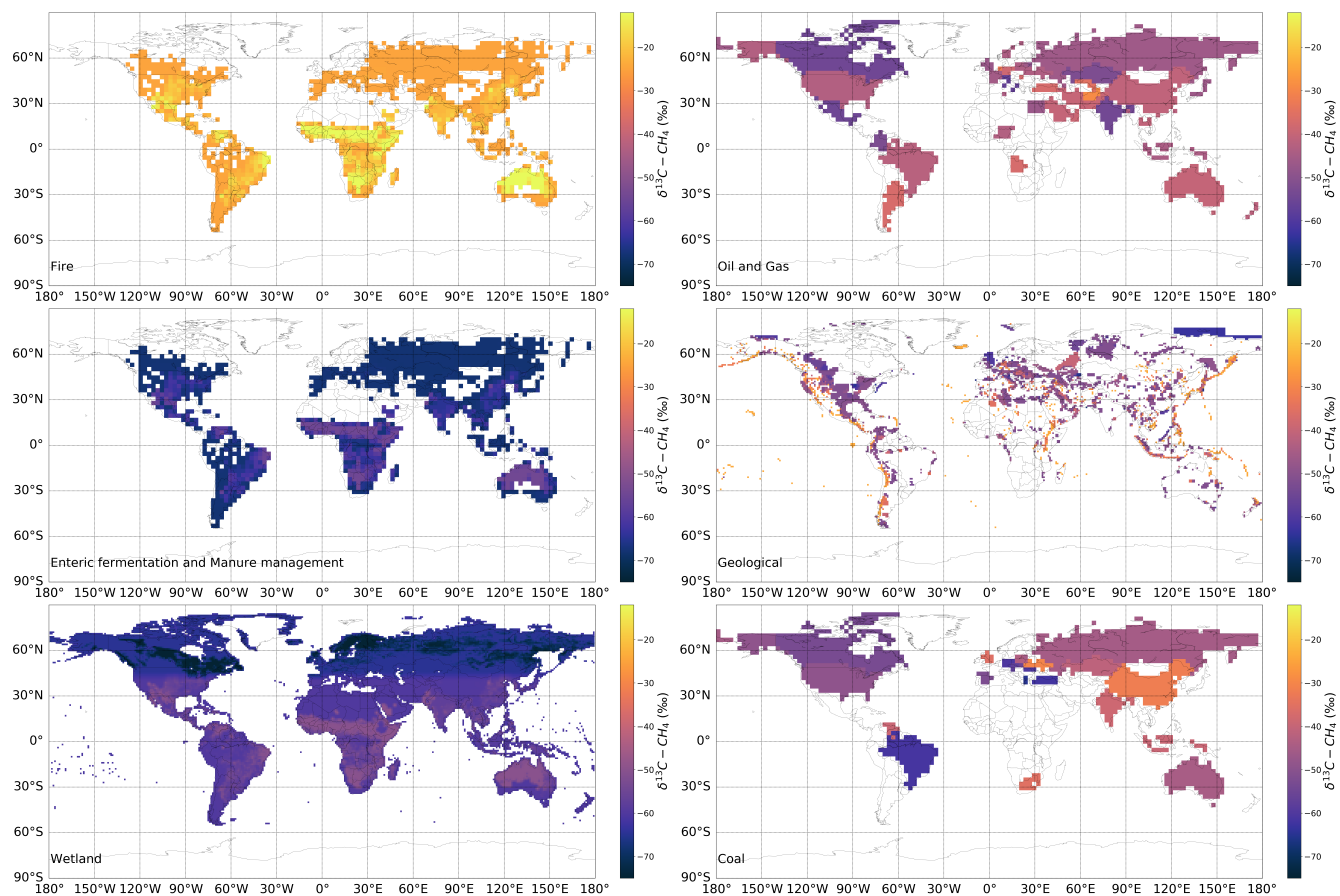

**Figure S2.** Spatially varying isotopic signature values used in simulations.

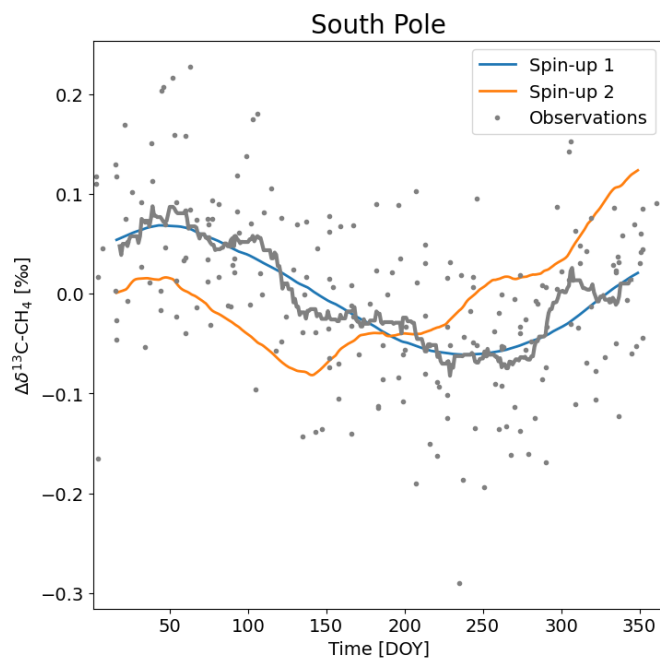

**Figure S3.** Modelled and observed average seasonal cycle at South Pole. Gray dots are individual observations between 2000–2006, and solid gray lines are 30-day moving averages of the observations. The colored lines are 30-day moving averages of the model estimates from spin-up simulations for year 2000 using original isotope signature values (Spin-up 1) and rounded signature values (Spin-up 2).

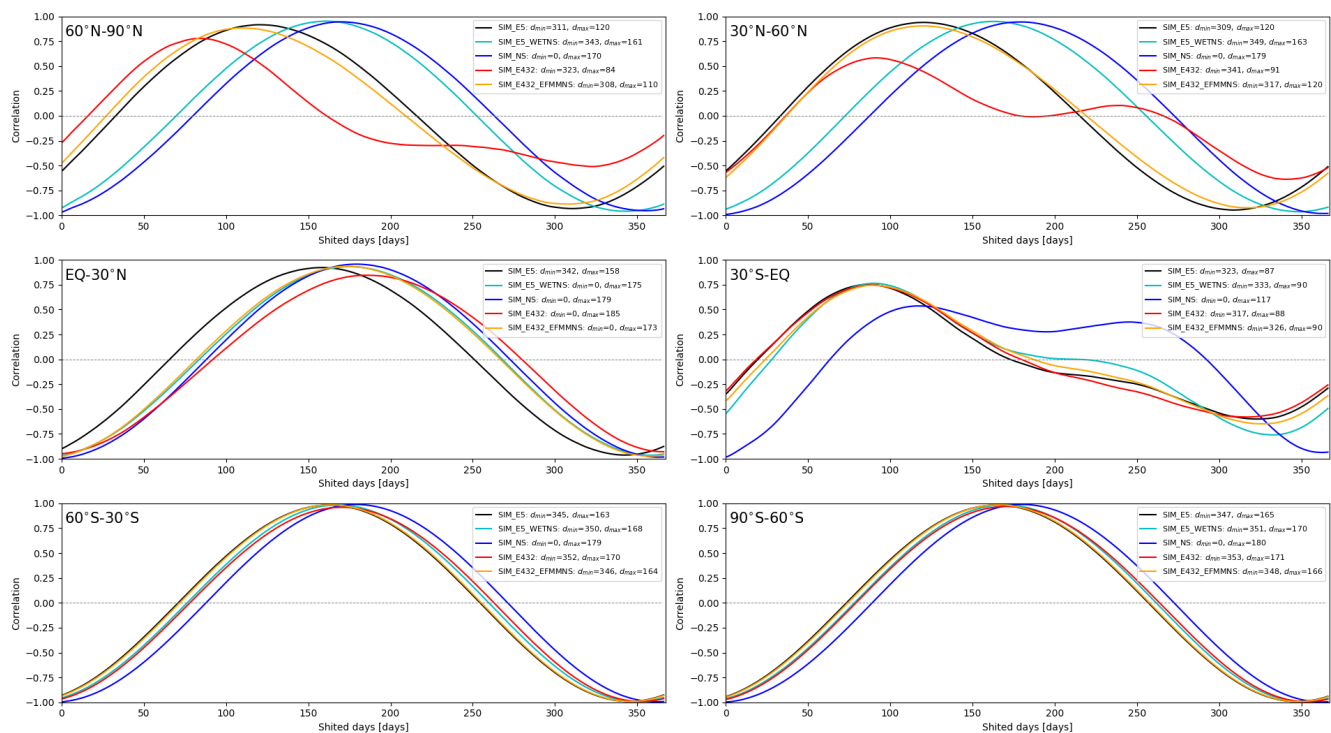

**Figure S4.** Shifted correlations of  $\Delta\text{CH}_4$  and  $\Delta\delta^{13}\text{C}$ , calculated from 2002-2012.

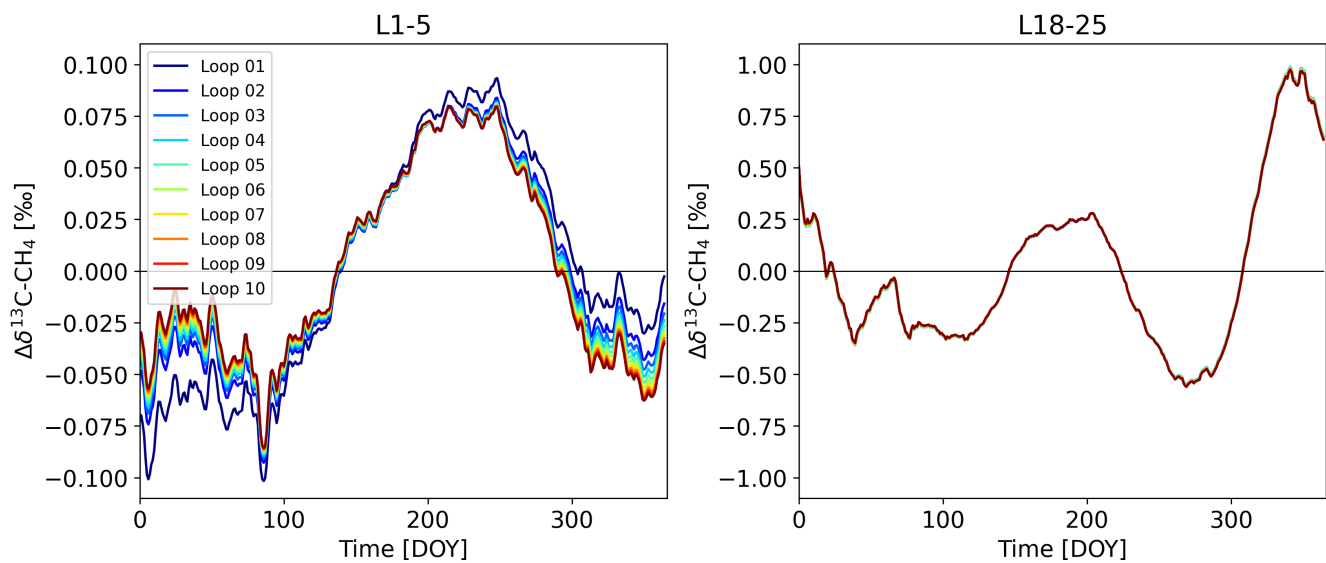

**Figure S5.** Detrended daily zonal mean  $\Delta\delta^{13}\text{C}$  at EQ–30° N, averaged over the lower most five layers (L1–5, troposphere) (top), and the upper most eight layers (L18–25, stratosphere) (bottom). The initial fields are taken from the 40-year spin-up using SIM\_E5 setup, and the year 2000 are "looped" over 10 times using EDGAR v4.3.2 emission fields. This illustrates how long the seasonality takes to stabilise when using different emission fields to those used in the spin-up. Note the differences in y-axis.

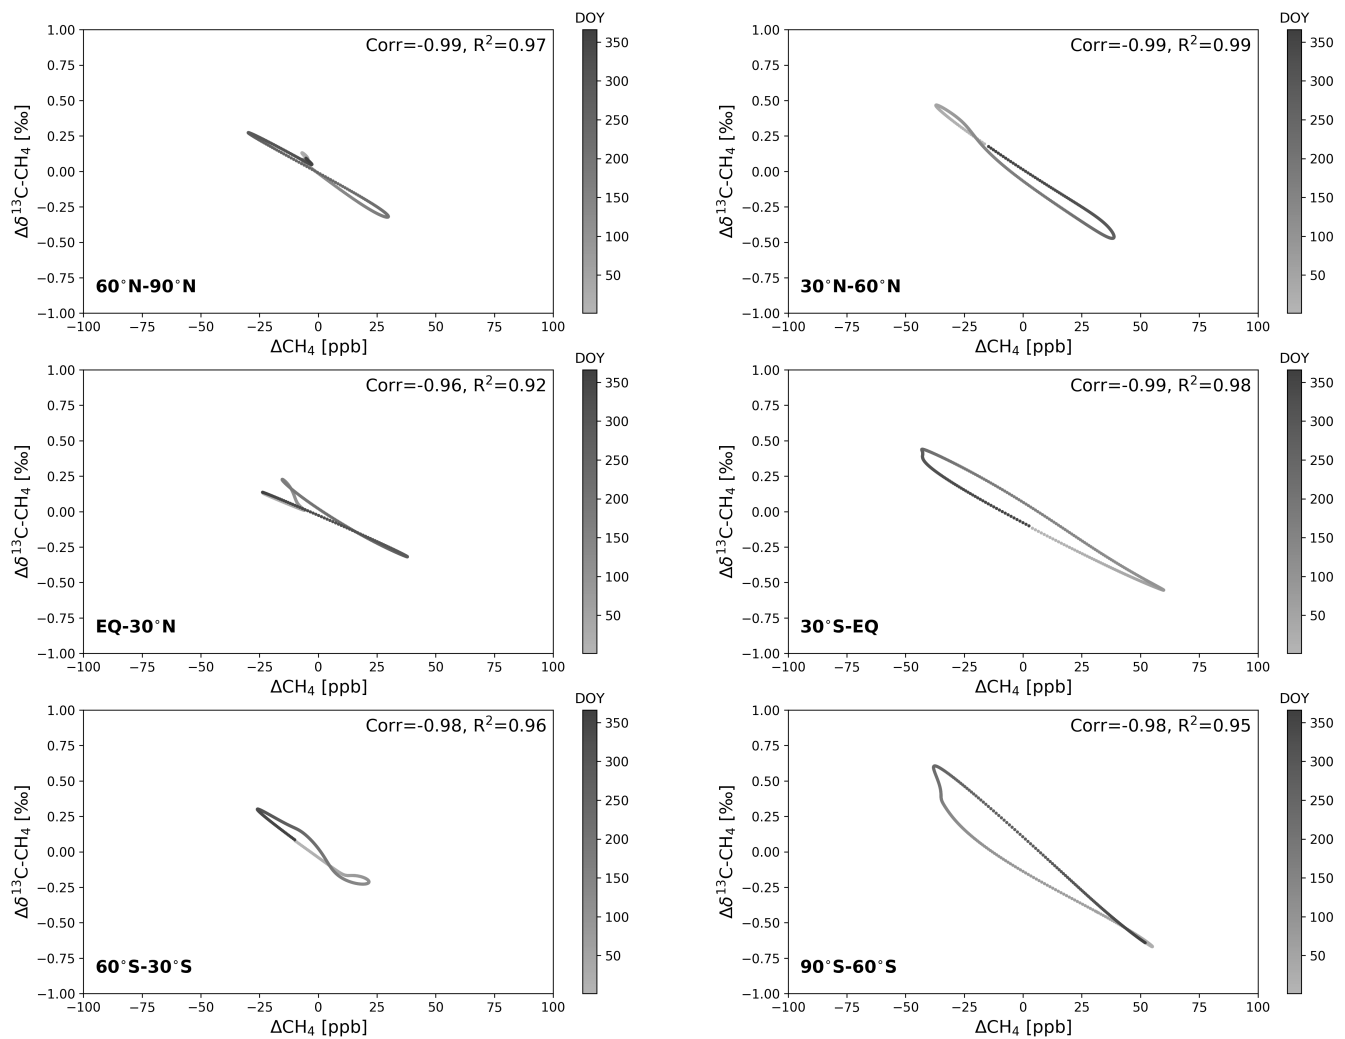

**Figure S6.** Detrended daily average  $\Delta\text{CH}_4$  against  $\Delta\delta^{13}\text{C}$  from the upper most 8 levels over 2002–2012 at 30° latitudinal bands. Color schemes indicate different simulations and the color darkness illustrates day of year (DOY). The lightest colors are DOY = 1 and the darkest DOY = 366.

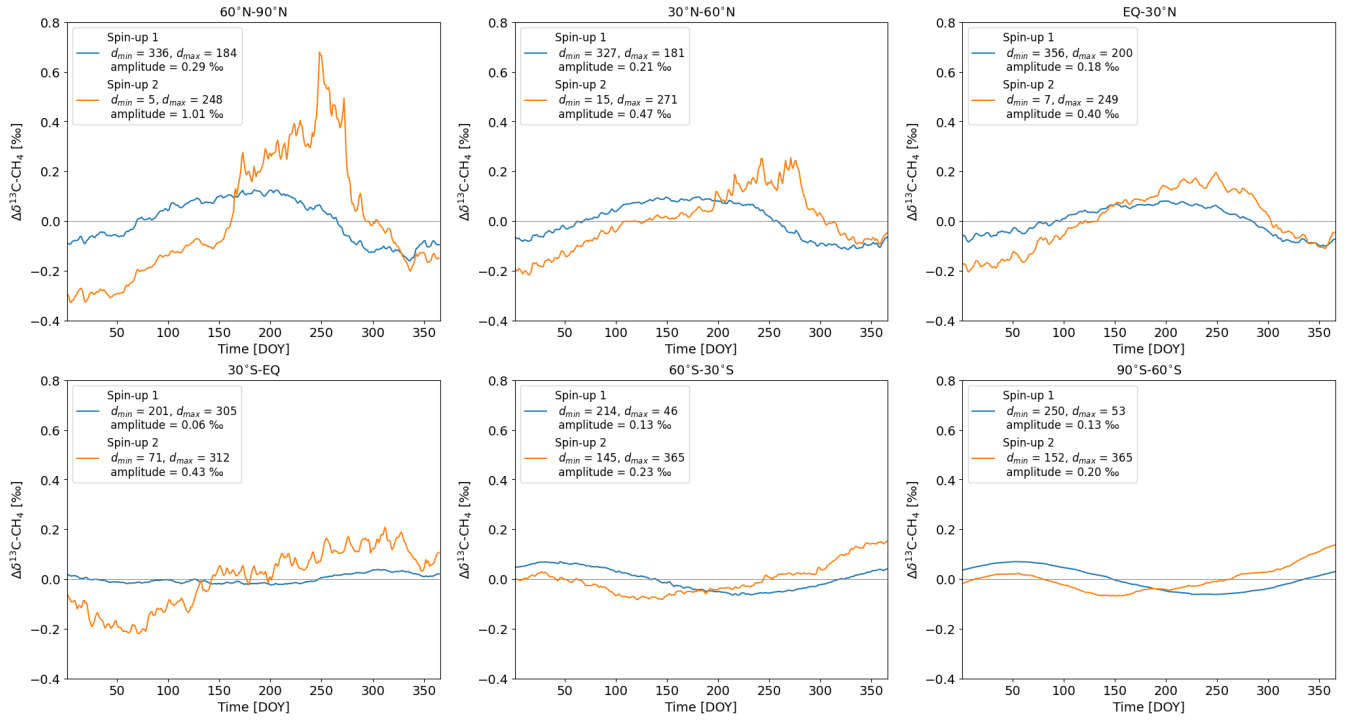

**Figure S7.** Detrended zonal mean  $\Delta\delta^{13}$  from spin-up simulations for year 2000 using original isotope signature values (Spin-up 1) and rounded signature values (Spin-up 2). The timing of seasonal minimum and maximum days in DOY are shown as  $d_{\min}$  and  $d_{\max}$ , respectively.

## References

Houghton, J. T., Meira Filho, L. G., Lim, K., Trennton, I., Mamaty, I., Bonduki, Y., Griggs, D. J., and Callander, B. A.: Revised 1996 IPCC Guidelines for National Greenhouse Gas Inventories, 1 - 3, 1997.
